# Supplementary material
Source: PubMed Central journal article supplement (PMC1803726)
Supplement: plntphys_pp.106.092320_1.pdf [file plntphys_pp.106.092320_1.pdf]

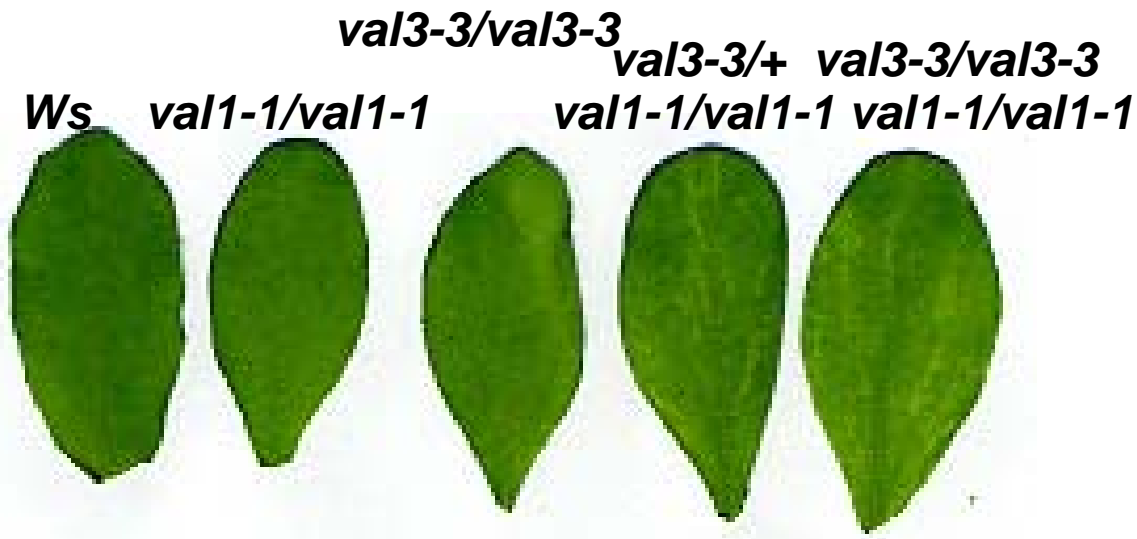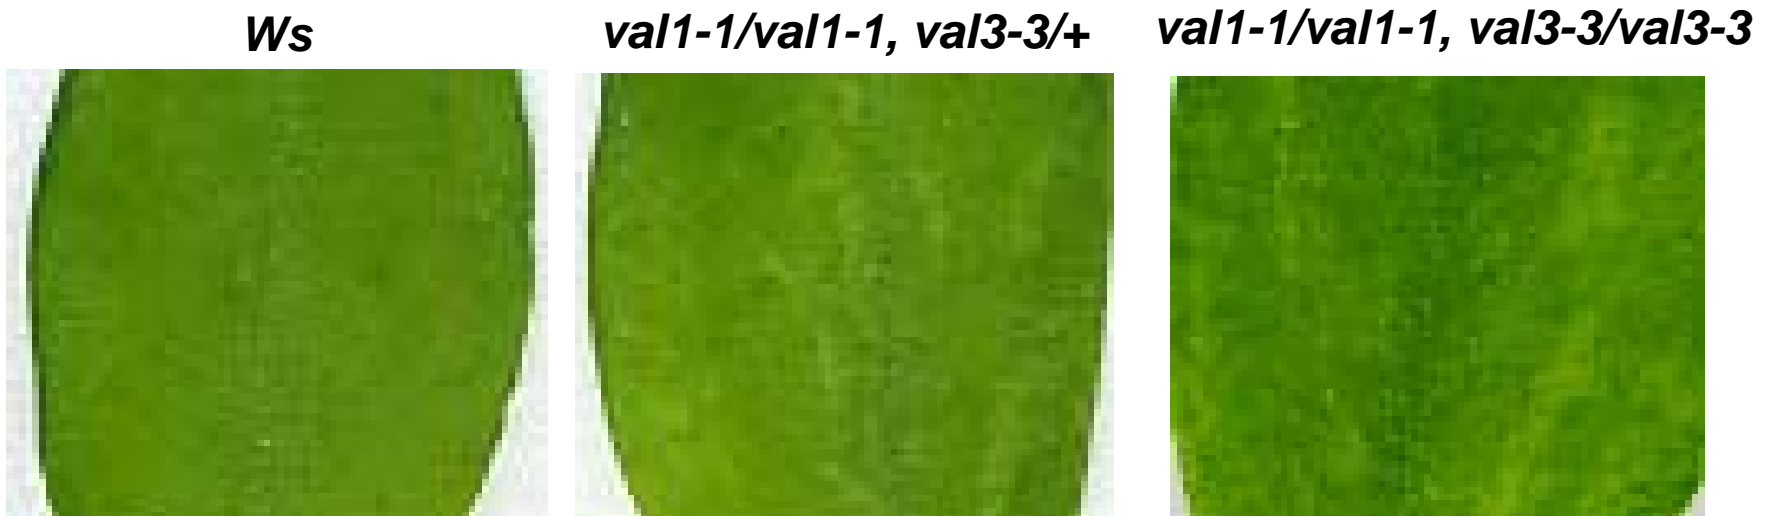

**Variegated leaves of *val1 val3* double mutants.**

Leaf samples were collected from the flowering plants.

Supplement Fig.1. Suzuki, Wang, McCarty.
