# Supplementary material
Source: PubMed Central journal article supplement (PMC1803726)
Supplement: plntphys_pp.106.092320_2.pdf [file plntphys_pp.106.092320_2.pdf]

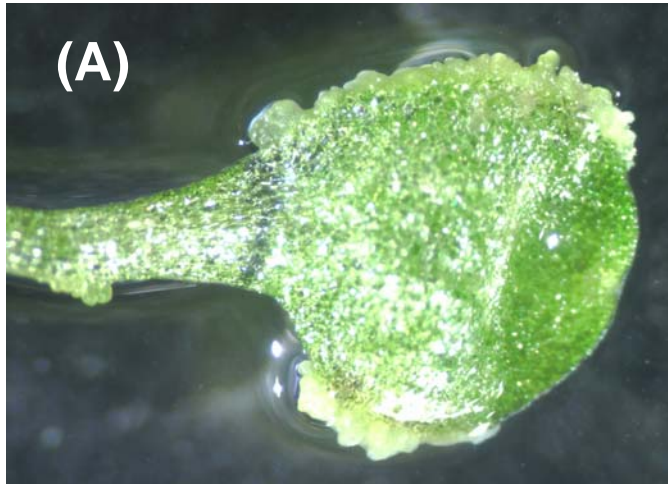

**(A)**  
***val1-1/val1-1* cotyledon**

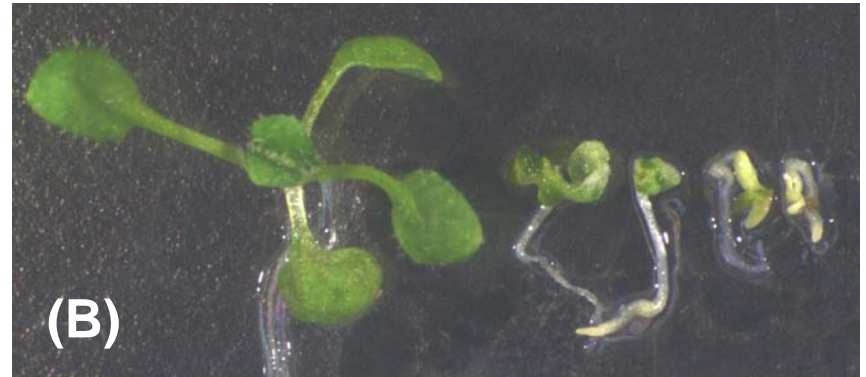

**WS**

***val1-1/val1-1*  
*val2-1/val2-1***

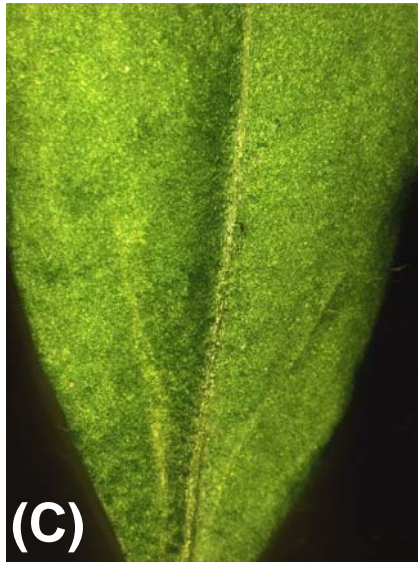

**(C)**  
***val1-1/val1-1***

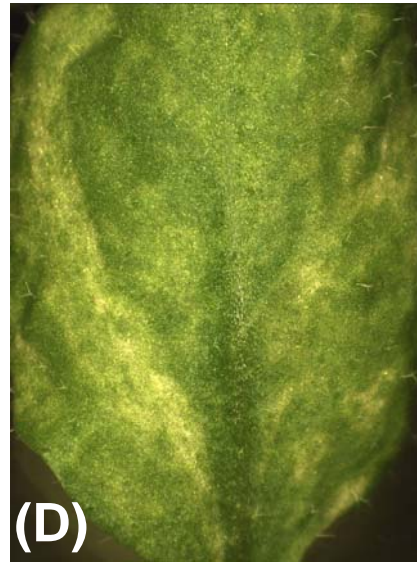

**(D)**  
***val1-1/val1-1*  
*val3-3/val3-3***

**Supplemental figure 2.**

Phenotypes of single and double mutants with *val1-1* allele in WS background.

- (A) Occasional embryonic tissue formation at the cotyledon margin in *val1-1* single mutant seedling.
- (B) Embryonic seedlings of *val1-1 val2-1* double mutant.
- (C) Very weak variegation of the 1<sup>st</sup> cauline leaf in the *val1-1* single mutant.
- (D) Variegation of the 1<sup>st</sup> cauline leaf in a *val1-1 val3-3* double homozygous plant.
