# Supplementary material
Source: PubMed Central journal article supplement (PMC1803726)
Supplement: plntphys_pp.106.092320_3.pdf [file plntphys_pp.106.092320_3.pdf]

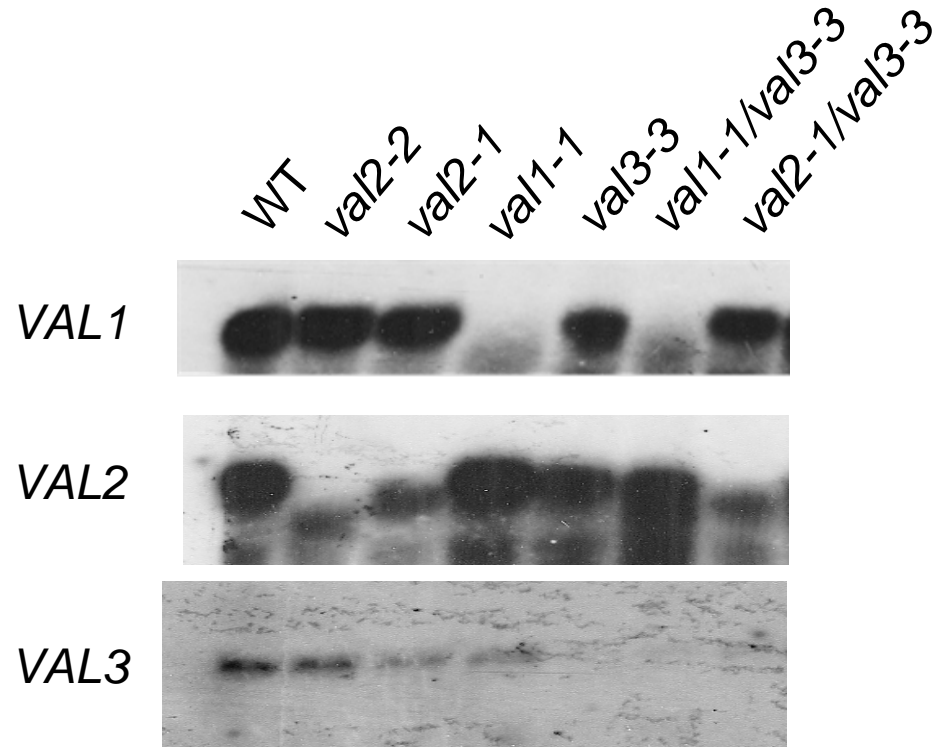

### Northern blot analysis

The total RNA was prepared from wild-type (*WS*) and *val* mutant whole seedlings for expression analysis for three *VAL* genes. The 12.5  $\mu$ g of the total RNA was resolved in a 1.2 % agarose gel and transferred onto a nylon membrane for hybridization. The cDNA for entire coding sequence of the *VAL* genes were used. The signals for *VAL1* and *VAL2* genes were obtained for 1day exposure, whereas those for *VAL3* were from 4 day exposure.
