# Supplementary material
Source: PubMed Central journal article supplement (PMC1803726)
Supplement: plntphys_pp.106.092320_4.pdf [file plntphys_pp.106.092320_4.pdf]

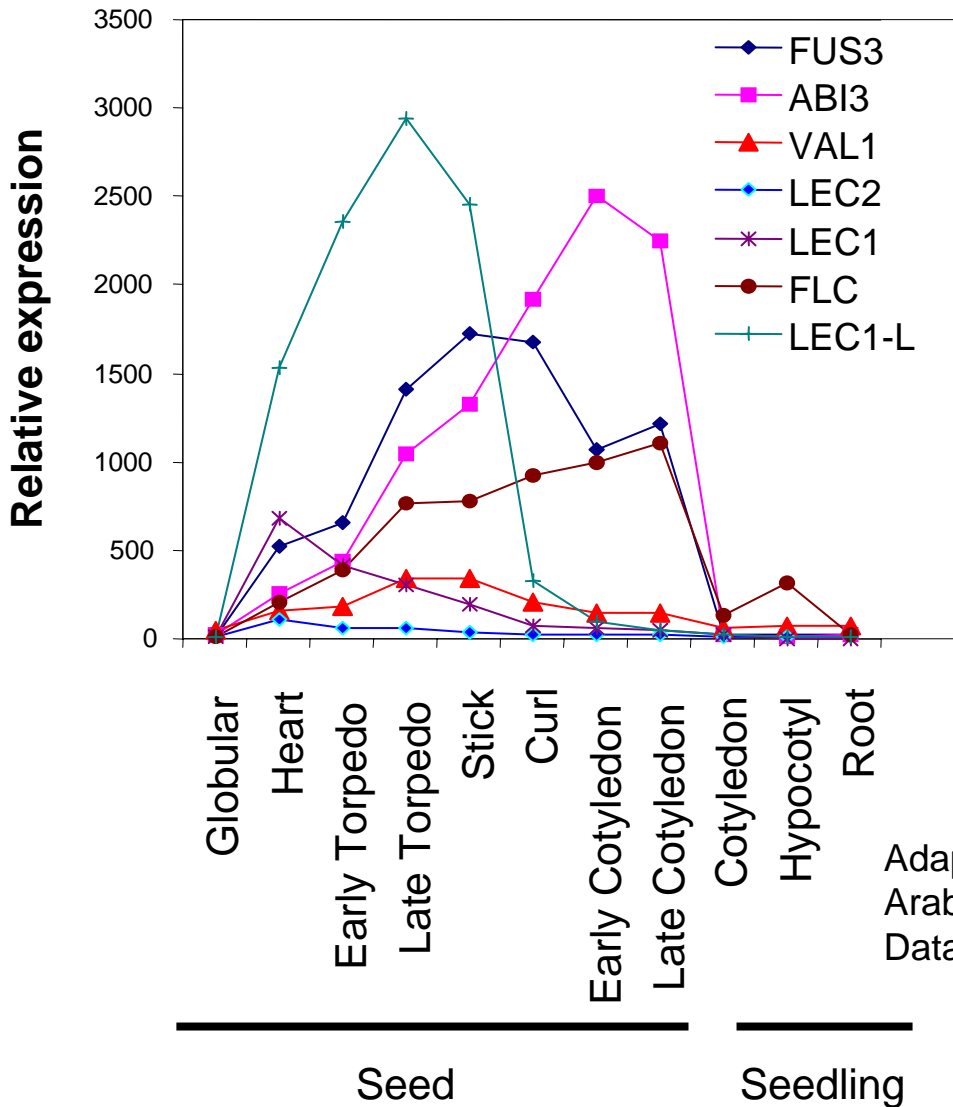

### Expression of regulatory genes in *val* seedlings

| Gene    | WT  | <i>val1</i> | <i>val2</i> | <i>val1, val2</i> |
|---------|-----|-------------|-------------|-------------------|
| LEC1    | 116 | 6           | 6           | 1070              |
| LEC1-L* | 32  | 20          | 24          | 2890              |
| FUS3    | 5   | 11          | 22          | 2092              |
| ABI3    | 14  | 8           | 20          | 681               |
| PKL     | 361 | 404         | 374         | 369               |
| PKL-L** | 2   | 15          | 2           | 264               |
| FLC     | 151 | 484         | 48          | 5277              |

\*AT5G47670 \*\*AT4G31900
