# Supplementary material
Source: PubMed Central journal article supplement (PMC1803726)
Supplement: plntphys_pp.106.092320_5.pdf [file plntphys_pp.106.092320_5.pdf]

## ATH1 GeneChip samples verification by RT-PCR analysis

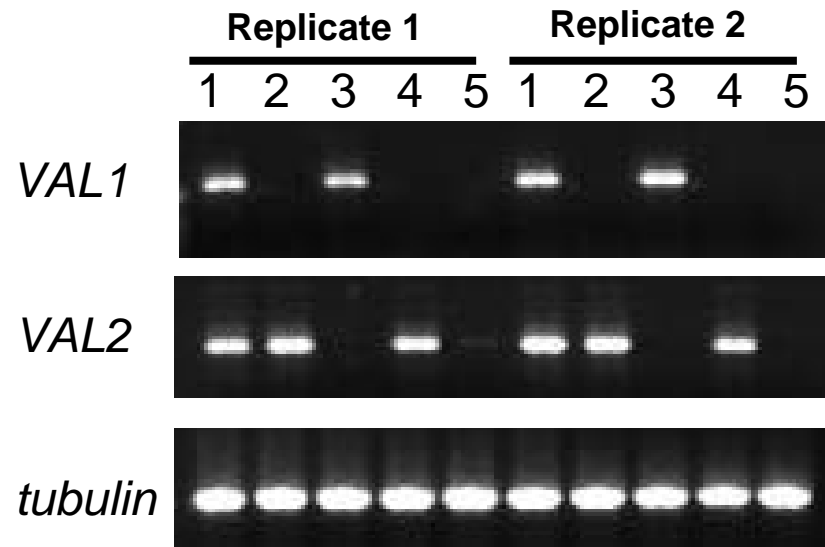

1, *Col-0*

2, *val1-2*

3, *val2-1*

4, normal seedlings from *val1-2/val1-2;val2-1/+ seg*

5, *val1-2/val1-2;val2-1/val2-1*
